# Supplementary material for: Body mass index trajectories and mortality in community-dwelling older adults: population-based cohort study
Source: HighWire-hosted journal article supplement (doi:10.1136/bmjopen-2022-062893), 2022-07-01

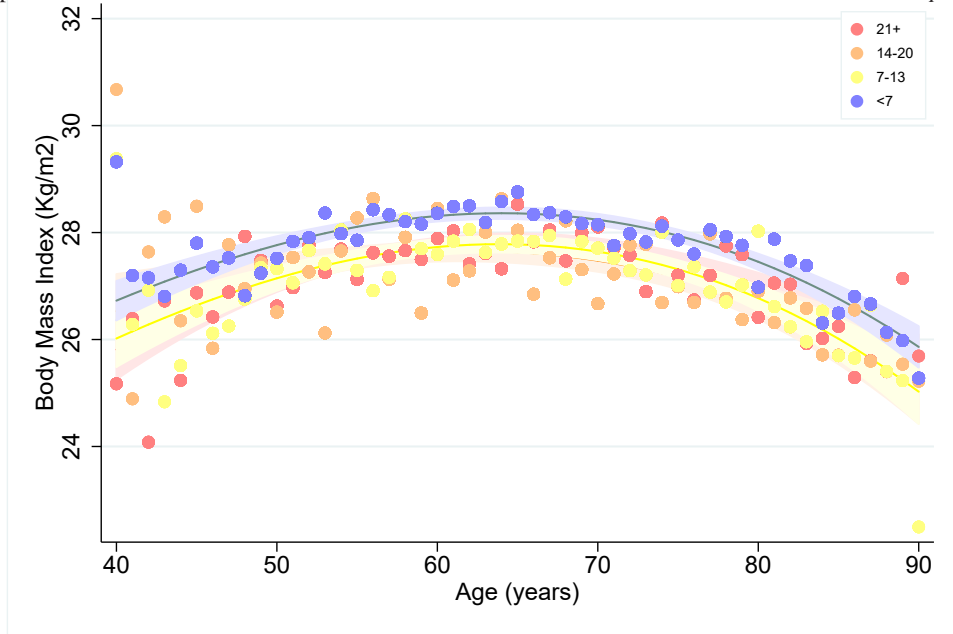

Supplement: bmjopen-2022-062893supp002_data_supplement.pdf [file bmjopen-2022-062893supp002_data_supplement.pdf]
